# Supplementary material for: Structural and ferroelectric properties of orthogonal crystalline in Fe-doped HoMnO3 synthesized at normal pressure
Source: Springer Nature journal article supplement (doi:10.1007/s10854-019-01078-6), 2019-03-13
Supplement: MOESM1 [file 16545254]

Electronic Supplementary Information

**Structural and ferroelectric properties of Orthogonal crystalline in Fe-doped HoMnO3 synthesized at normal pressure**

Yizhang Wua, Qiyun Xieb, Meng Lia, Xiaofan Suna, Hong-Ling Cai*a, X. S. Wu*a

a Collaborative Innovation Center of Advanced Microstructures, Lab of Solid State Microstructures, School of Physics, Nanjing University, Nanjing 210093, People’s Republic of China

b Key Lab Radio Frequency & Micronano Elect Jiangsu, Nanjing 210023, Jiangsu, People’s Republic of China.

## X-ray diffraction:

Figure.Eq1 X-ray diffraction patterns of samples of HoMn1-xFexO3

## Rietveld Refinement

Figure.Eq2 Rietveld refinement results (a) *x*=0 (b) *x*=0.05 (c)*x*=0.10 (d)*x*=0.15

## Structural of Different Crystalline Phases


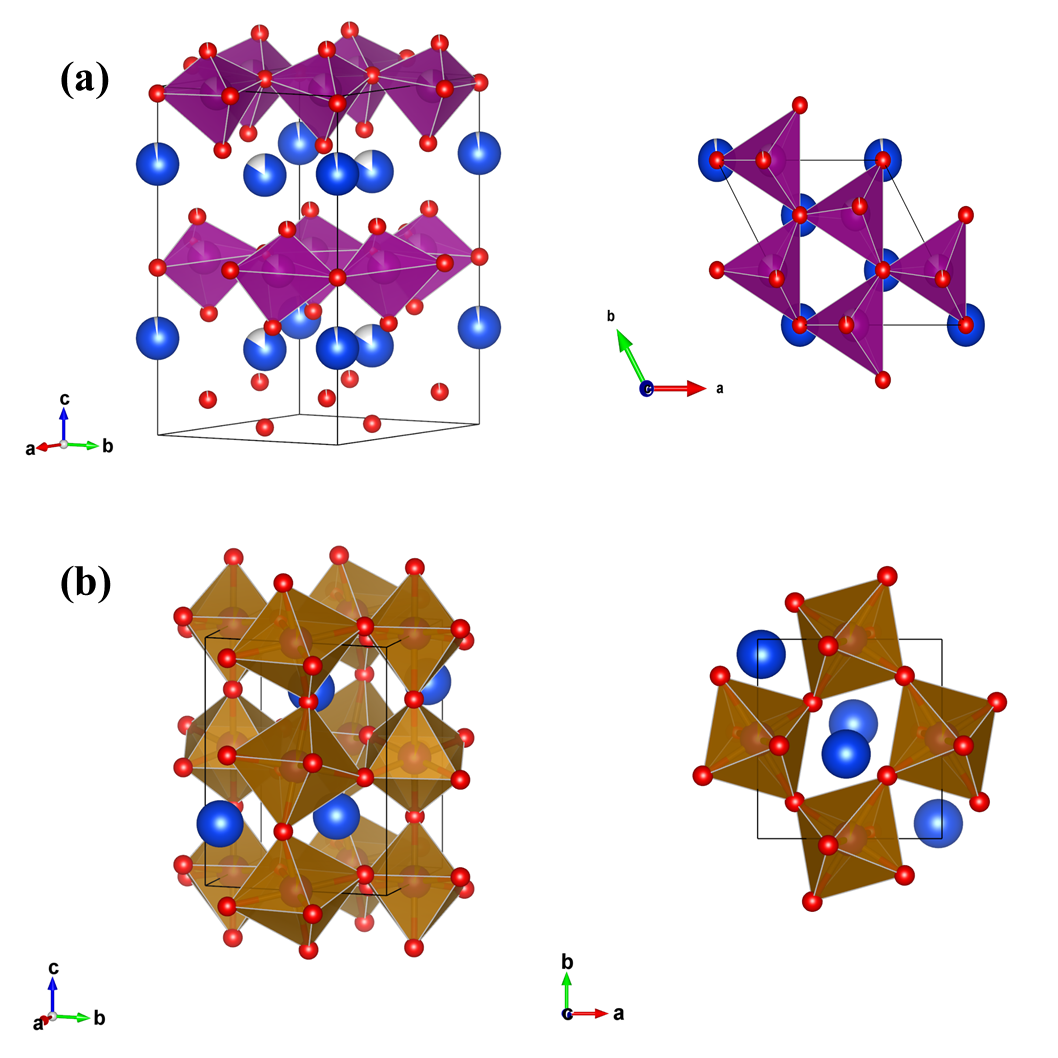
 Figure.Eq3 (a) Schematic representation of hexagonal symmetry of system (space group ). (b)Schematic representation of orthorhombic symmetry of system (space group *Pbnm*). These two figures correspond to the spatial structure of *x* = 0.05 and *x* = 0.15, and their data are derived from experimental XRD refinement data. It can be clearly seen that the spatial structure exhibits a hexahedron of MnO5 at x=0.05 and an octahedron of MnO6 at x=0.15.
